# Supplementary material for: Daphnia Halloween genes that encode cytochrome P450s mediating the synthesis of the arthropod molting hormone: Evolutionary implications
Source: BMC Evol Biol. 2008 Feb 25;8:60. doi: 10.1186/1471-2148-8-60 (PMC2276477; doi:10.1186/1471-2148-8-60)
Supplement: Additional File 1 — Putative substrate recognition sites (SRSs). [file 1471-2148-8-60-S1.pdf]

## Additional file 1

### Putative substrate recognition sites (SRSs) 1 to 6.

**P/G-rich**

*Tribolium* Spo-CYP307A1 1 MLALLCLCVLLVWVFSRPKKSPS-----TIPGFRPWFLIGSMHLLAGH  
*Daphnia* Spo-CYP307A1 1 MADSLFTRIKSKAQRLLVRSHLAKSSAAKASAAAATAVPVVTPAAATSAGTSAGVVAKPTSPFPGEVGVWPVIGSIHLLQY  
*Drosophila* Spo-CYP307A1 1 MIAALITITLALLLSVIATSYICIIYG-----VKRRVLQPVKTKNSTEINHAYQKTTQAPGFRPWFTIGNLHLLDRY  
*Drosophila* Spok-CYP307A2 1 MLTSVFYVLFATAITILISYVFLLLK-----CKQKAFVVIGLLYQEKK---YQCEQDQAPGHPWFTIGNLHLLRF

**SRS1**

45 -ETPFQAFALSRVYGDIFSIHLGSASCVVNNFKLIKEVLIAGGGDFGGRPDEFREHKLEGGDRNNSLALCDWSSLQKT  
81 -EVPPFAFSELSKIYGDIFSTLTGSTPCVVVNSFKLIKEVLIAGGGDFGGRPDEFREHKLEGGDRNNSLALCDWSSLQKT  
74 RLSPPFAFALAAQYGDIVSLTFCHTRCLVVNNLELIEVLNQNGKVMSSGRPDEFREHKLEGGDRNNSLALCDWSSLQKT  
70 QYNPFYCFGTLTTKYGDIVSLSLGHTRCTIVVNNVDLIKEVLNKGKYEFGGRPDEFREHKLEGGDRNNSLALCDWSSLQKT

124 RRSLARTYCSPRFTLQYDRVNNVGEETKSFHQDLQLP---HGQPCNVKPAVLMVCANMFTQYMCSTSEAYEDKGFQ  
160 RRSLARHWCEPRVDSMQFDTLSRMLTSBSDLMLNELSLMTAAAAAGKIDUKTTMMTCANVFTHYMCSTREDYNNKEFG  
154 RRNLARRHCSPREFSCFYMKMSQTGCEEMEHWNRELGNQLVP---GEFINIKPLILKACANMFTQYMCSLREDYDDVDFQ  
150 RRNLARRHCSPRESSYFSKMSLETGGLEVNQLLDQLTN-ISS---GYPCDVKPLILAAASANMFTQYMCVRRNYSRKGFG

**SRS2/3**

200 KIVRYFDEIFWEINQGYAVDFLPWLLFVVTGHHKKTISNMAETIRQFILLSRIIDKFRATLITNSPERDFTDALIMHLEEDP  
240 KIVRLFDQIFWIDINQGYAVDFLPWLMFVRRHMQQLKSWGTDIRQFIVKTIIDEFRSTMDVNNP-RDFTDVLLSOLGNEK  
231 QIVQYFDEIFWEINQGHPLDFLPWLIFEFYQRHLNKIINWSSITRGFIMERIIRHIELSVLDLEEDRDFTDALIKSLLEDK  
226 KILEYFDEIFWEINQGYSEDYIPWLVEFYCNHLSRIVHWSASIRKFTILERIVNHRRESNININEEDKDFTDALLKSLKEDK

**SRS4 Helix-I**

280 N-----MNVCHITIFELEDFLGGHSAIGNLVMMTLAAVVDHPEVAKRIQEEVDQVTG-GTRCPNLFKAA  
319 NNGENVQAADHNDNEKQLDWNHVLYLEDFLGGHSAIGNLIMRAVGELCSSPHVMANIQEEIRRVTCDNSRPVLEDRPS  
311 D-----VSRNTIIFMLEDFLGGHSAIGNLVMLVLAITAKNVDTERRIQEEIDATIEEENRSDNLLLMNA  
306 N-----VSRNTIIFMLEDFLGGHSAIGNLVMLALAYIAKNETIALHIREVDIVSAGGIRRECLYVMNV

**Helix-K SRS5**

343 MPYTEATILETLRTASSPIVPHVASKDTEIDGHEVSKGTIVFINNYELNQCLAYWDEEGL-FKEERFLSST-----  
399 MPYTEATILETLRLSSSPIVPHVAMQNTSVAGDIVQEGTIVFINNYELNISDYVWGDQALTFDARFLIQ-----  
375 MPYTMATIFEVLRYSSSPIVPHVATEDTVISGNGVTKGTIVFINNYVLNTSEKEFWNEKE-FNELRFLFP----SKEQSP  
370 MPYTMASISEVLRYSSSPIVPHVAMEDTVIKGGVVRKGTIVFINNYVLNMSSESWNHPEQ-FDERFENNFTNNKESGL

**Heme-binding**

413 -----GNIVKPAH-----FIPFSTGKRTCIGQLVQCFSEFVVLATLLQYDVSTKE  
469 -----GKIVKPEY-----FIPFSTGKRACMGYRLVQHVSEFVTLATLLQNEDVSAE  
450 K-----NSKGSDSGIESDNEKLQ---LKRNIPIHFLPFSTGKRTCIGQLVRCFGFLVVVNVNQRYNISSHNP  
449 KCDDNKRTEFIRKNDNDSGTSKSKYGGKQNLNNKLLKKSIPQFLPFSTGKRTCIGQLVRGFGFLLLANIQQNNVNSADP

**SRS6**

459 SVKVQP-GCVAVPEPDCFKLVLTTPRK-----  
515 DWIHLPKACVAVPEPDAFRVVLTPRPSPAPASY  
514 STIKTSFESLALPADCFPLVLTTPREKIGPL-  
529 SKIKLEKSSIALPKKCFKLSLRPRT-----

P/G-rich

*Apis* Phm-CYP306A1 1 -----MILDHYIAIFVLP---FLLLLVVRK--NRKARRLPPGPWQLFLLGYLFWIDAEKPHHTLTRLSR

*Drosophila* Phm-CYP306A1 1 MSADIVDIG--HTGWMPSVQSLSIILVPGALVIVILYLCEQCNDLMGAFPPGPWGLFELGYLFFIDARAPHKSLQKLAK

*Tribolium* Phm-CYP306A1 1 -----MAPLWSVLLS----FLLFTIAYTWLRRSRNLPPGPWNLPVIGYLAWLNPPQFFYYTLTSLSK

*Daphnia* Phm-CYP306A1 1 MEEGVLEEEEARSVGVWAWLSLSSILLGLLALWLREHSQQNRQLLLLPPGPBSGLFWLGYLFWIDSRAPYBTFAELSR

**SRS1** **Helix-C**

61 VYGPVCGFRMGSVYTVLLSDPQLLRQSFADKSTINRAPLYLTHGIMKGYGLICAEGEQWKDQRKFISNCLNNEGMVKHEG

79 RYGGIEELKMGRVPTVVLSDAALVRDFERRDVMIGRAPLYLTHGIMGGFGLICAEQEDINWHARRETIDWLKALGMTRRPG

58 KYGPIVGLYLGSIYTVVISDAKLTKKTENKTDASSGRAPILHHTHGIMKGFGLICAEQEDLWKDQRKFVHNTLTRTGASVVS-

81 RYGRITSLKLGDMIAVFISDPQLVRQAFSRPVFSGRAPLYLTHGIMKGHGLICAEGESWREHREFVMNVMKQLGMAGR-

141 AKRDKMEERTSDAVNECVSVLR---DRGANGPIDPLDTHHCLGNLVNSTVFGKTYEESIRIMKWLRLHQEEGVKQIGVA

159 ELRARLERRIARGVDECVRLFDEAKKSCASEVNPLPALHHSLSGNTINDLVFGITTKRDPFDWLYLQRLQEEGVKLGIVS

137 PNRPTMEALTLHHVSLVQHIIK---SLGESVTLDPDLSLRHSLGSAINQMVFGKCSRODATWKLQHLQEEGTKKHIGVA

160 -GASVMESRMMAGVLEFVHCQVT--DGVGGGVLDLPGLRHCTIGNIINGVVFGRTYAADPTTWLWQLHLLDQGVKQVAVA

**SRS2/3**

218 GELNLFLEFLRELEQYGRVIRSVTDGKDKTHEIYRQILDEHRARVDS-----GNGCKII

239 GVVNFLEWLRHLEPNVNTREFLLEGKAKTHAIYDRIVEACGQRIKEKQKVFKELEQEKRLQRLQLEKEQLRQSKEADPSQE

214 GELNLFLEFLRELEPKSKQTINELTEGIRDTHQIYREIIEEQKNSSNE-----TVSNVI

237 GEINFLVLRLELPSYRKIMSEILDGQAETHRHYQEIILQRLNLSANQG-----PDYTSVV

**SRS4** **Helix-I**

270 DSELAAFDEQMRKKD-----GAESGYTEEPQLYHLLADLFGAGTDTTLTLRLWFLLEMAAHPMEEQEKIQS

319 QSEADDDDEESDEEDTYEPECILEHFLAVRDTDSQLVDDQLRHLLADLFGAGVDTSLATLRWFILYLAREQRCQRLH-

266 QAEFLAEKKEKKNEDS-----VKFYNDQCEHYLLADIFGASLDTTLTLRLWVLYMAVHQDVQKKVR-

293 EAYLLDMQRQSAGIP-----PETETTVQLHHVLADMFAGTDTALTITKWIPLYILYLDVQERTHE

**Helix-K** **SRS5**

335 EMDLCIREGEQP----TINRIVMERLEAATAEVQIRSVTPLGIPHGTSSELVEIGGYDIPCSAMIVEMQWALHTDAYW

398 --ELLPLGPSP----TLELEPLAYLRACISFTMRIRSVVPLGIPHGCKBNFVCGDYETKGGSMIVCSEWAIHMDVAV

327 -----SLNDL-----TLEQIAMVPYFEATIAEVQIRFVVFVGIPIHGSVEELETAQYKIPPGSMIVPLQWAVHMDANIW

356 EIERVVGQLDQGRIPCYATARRMEWTEATICEVQRLKTIPLGVPHGTLQDCELAGYRIEKSAMVVFVWAMNLDFTLW

**"PERF"** **Heme-binding**

411 RIPLEFRPDRFLSEDG---TEFFKPESTLPFQNGRRVCVGEELARMITILEFAGRIILAFSVRVPAGEIADLEG-----ECG

472 EPEEEFRPERFLTAG---AYQAEPEQFIPFSSGYRMCPEGEEIARMILITLETGRILRREHIELEBSGTEVDMAG-----ESG

397 DEPEVFRPERFLNEEG---KEFKPEAFIPFQAGKRMCMVGDELARMELYLEGAAVLRNEATSCMG--EVDLTG-----DCG

436 EPELQFRPERFLIEEKEKWRVEKPEHFLPFQCGRRMCTGDDLGRITILEFTVTLLQHERLSFEPQFTDYSATNFPQETYG

483 ITLVFPHHRLAEVGRDR-----

544 ITLTETPHMLRFTKLPAVEMRHAPDGAVVQD

467 ITLTETPHELIETSL-----

516 FTLVPHHYPVALHPR-----

*Daphnia* Dib-CYP302A1 1 MFSKQIPWTLCLPSRLCGGQKCVDKQVYYFNQTTCLNCPHQFPTSESTK---EMRPFSGSIPGKPLPVVGNLWRYA--I  
*Tribolium* Dib-CYP302A1 1 -----MCLFS-----KKSVMHYLLTIRTRNYYYRGRFLTAVD---PKSEFKETPGELSLPLVGTLYLYEEFI  
*Apis* Dib-CYP302A1 1 -----MCTLL-----KKNQSIRKKLFIKFYSNEFTTKIKIKINHSQKAFYDIIPGPKSLPIIGTLYKYLEFI  
*Drosophila* Dib-CYP302A1 1 -----MLTKL-----LKISCTSRQCTFAKEYQ-----AIPGRGPFPGMGNLYNYLEGI

P/G-rich

SRS1

76 GQYSEFDQLHVTGLKKYLQEGPTVREEILPGVNLILLYRPEDIERTYQVEG-RYFSRRSHTALEFYRLQRPHTYNSGGLLF  
60 GRYQFDRLHKNALKNEQLYGPITREEIVPGEHIVWLGLEDDIAKMEHTEG-TYPYRKSHLTLEKYRLDRPHIYNSGGLLF  
63 GBYSEFNLYESGKKKLLKCGPLVREEILPNVNIWIYRPEDIAELKAEESGLHPERRSHLALLRYRKDRPNIYNTGGLLF  
44 GSYSLRLRLHQAGQDKNEKYGATVRETIIVPGQDIVWLYLEKDIALLLNERD--CPGRSHLALAQYRKSRPDVYKTTGLLF

Helix-C

155 TNGPEWTRLRQALQEPINMMENTROYIPGIDNISSEFAEQIAISIKNKTSDFDFEDLSKVFLEFIGLMTFETRLGSLR-  
139 TNGPEWSRIRKVFQKGLSGTEALSFIKGSDDVISEWLDTRFKKIHKETSNDMFLQELSRFLLELIGVAAFLTRFQSEHD  
143 TNGSEWWRIRKEFQKVSSKEQDVINYLKETDCVIQEFVE--LCNNEK---FADFPLLSRLFLLELTCLVVFETRLNSES  
122 TNGPEWWRIRAQVQKELSAKSVRNFRQVDGVTKETIR--FLQESNNGGAIMLPKLTRLNLELTSLLTGARGLOSETA

SRS2/3

234 TLPGDSCPNKLTQAASDTNSEILLRTDNGLOFWRKKNTPAYKRITRSCQYERVAESEFVNAKNAELRSENGQDQSQKTL  
219 DELDPOSKSKILLKESAFVTNSTILKTDNGEQLRWRKEETPAYRRLRKAQELMESVAIDLVALKLTFTFKETS---NPTILL  
218 PERCENSISSKLIKAAAFATNSAILKLDNGLQLWRLEETELYRKLRACTYMEMIALELVSRKKNNMKIRYN-----KSF  
200 CRQDPSSRSTHLMDAEETNSCILPTDGLQLWRFLFETPSERKLSQAQSYMEGVAMELVEENVVRNGSVGS-----SLI

SRS4 Helix-I

314 EVYLTSKDLVDKDVVTIVSDMLLAGIDTTSYTMSEFILYHLAENFLKQEKVYQEVNRFVPNSTSEVTTQGILA-ELKYLKAA  
296 ERYLASASLDEKDIIGVVDPELLAGMDTTYSSSFILYHLATNPSTODALYEEAGRILPNPAAPLTTEKYK-QAEYAKCA  
293 LAYLENFVLDIKDIVGMACDMLLAGIDTTSYSTAYILYHLAENQNIQEKLRIEATQLLKNHNEPISINILR-NASYTKAV  
273 SAYVKNFELDRSDVVGTAADLLLAGIDTTSYASAFILYHLAENPEVQCKLHEEAKRVLPKAKDELSDMALRTDITYTRA

Helix-K

SRS5

"PERF"

393 VKESLRLNPISIGVGRILPEDSSFSGYHCPKNTILVSONQVSCKLRYFKNELLVPERWMKGDAAYEKT-----HPY  
375 VKESLRLRPISIGVGRQLTDDVVFESGYKVFSGTVVVTLNQVLSRMEKYFPPEPDSKPERWMKNDPFSYVQT-----HPY  
372 VKESLRLNPISIGVGRILQTDVVLVSGYRVPKGSVVVTQNTICRLPEYFESPNLTPERWLREYSENNNKINYKKTVHPY  
353 VKESLRLNPITAVGVGRILNQDAIFSGYFVPGKGTIVVTQNMVRCRLQHFQDPLRQCFDRWLQHRSALE-----PY

Heme-binding

SRS6

466 LVLPFGHGPRACIARRLAEQNHILLRLVKRSTEWNG--AELDVRSQLINRPDAPLKFNFVERRNC---  
448 LVLPFGHGQRSCIARRFAEQNMVILLKLARKYKLRWNG--SEIDSKSLLINKPDAPILLSEFPR-----  
452 VILPFGHGPRSCIARRFAEQNMQILLRLCRRLKISWHG--DDLGMISLLINKPNALLKFNFDHILNNSV  
423 LVLPFGHGMRACIARRLAEQNHILLRLRETELINSGSDDMGVKTLLINKPDAPVLIDLR--LRRE--

**Apis Sad-CYP315A1** 1 -MNLAQNILKSGKSVLSNNVIALKYNIPGCGYAGASQTSRIDDLSDISKSTDGGNRSKIEITEKLDRNRYGTVAVATSE  
**Tribolium Sad-CYP315A1** 1 -----MLFRRVIAQLSTRP-----KSS-----LVSANTV  
**Drosophila Sad-CYP315A1** 1 MTEKRERPGPLRWLRHLLDQLIVRILSLIS-----LFRSR-----CDPPPLQRFPA TELPPAVA  
**Daphnia Sad-CYP315A1** 1 -----MASYL RHP IRRISLIER-----RCYTAKS

#### P/G-rich

80 SILQEMHEPFGTIFVEGTILFSFILSGGPKIQHEYVDKRHKELGFIYKERIG-PTTAVFVNSIHEERKIERLEGSTPKHELP  
 25 LHEDEIFSPKGLPLVGTTLALIAHGSTPKLHDYVDKRHKQLGPIFKEKLG-PVSAVFVADPDEIRAVEDHEGKHPLHWLP  
 54 AKYVPIHRVKGLPVVGTIIVDLIAAGGATHLHKYIDARHKQYGPPIFRERLGGTQDAVFVSSANLMRGVFOHEGQYFQEBLP  
 25 QPEDSIEAPKGLPLVGTLDVIRAGGVSOIHRYLDDRHRLQLGPIFKEKLG-HVEAVWLADPALYEQVQKEGTCPRFMLP

#### SRS1

#### Helix-C

159 EAWTLTYNEILKRCRRGLLFMNGEEWYFRILNKMVLLPDPTNLMIAPCQEWAIETKRWKQIKT--NNIISN-----  
 104 DAWVAYNQMYSCPRLFFMDGANWYHREIMNRLLLKGDFR-WIEGACECVSDKLT--DSLME--SDYCGN-----  
 134 DAWTLYNQOQACQRLFFMEGAEWIHNRRILNRLLLNGNLN-WMDVHIESCTRRMVDQWRRTAE--AAAIPLAESGEIR  
 104 EEWLILNKKHAYKRGLEFFMOGEWLRYSKILSPLLKTATLHRHIESFYDADRLLDKMEHTENGLITH-----

#### SRS2/3

230 -----LQVQLYQWSIEAMMATLMGSYWYSYKH-QLSRDFEILAEITLHEITFEYSANLSITPVKIAMNRLRFVWKKFVASA  
 171 -----LEATLYKWSLDVIVSILLGSGSYSQLCGELEPKVQKLAQVTHLVEQTSANLALIPASBASKFKIPQWRRFVDSV  
 211 SYELPLLEQQLYRWSTEVLCCEIMFGTS--VLTCFKIQSSLDYFTQIVHKVEHSSELMTFPPRLAQILILELHWRFDEANV  
 173 -----LEGDLYCMFVQVFKNEILKTK-----ITCWASIGSARLTLLPPALAAKNLDAWRCEQSA

#### SRS4 Helix-I

303 ITAFEIVRMLVPEMA-----KLGNGLLKMMDEGIRAEIAICIVTDETLAAGDTTATTLQWILLLLCNHEKEEEL  
 245 DNALAQNALMDTLTEK-----KPHSDGLLPKLLAEQITLEDIKRIIVDVLVLAAGDTTAVAMEMWMLVLAASFQICEKL  
 289 DEVLREGAALIDHCHRVQEDQR-KPHDEALYHNLQAADVPGEMIKRIFFVDLVLAAGDTTAFSSQWALFALSKEERLQORL  
 229 LSAQLANQLTQTCLEKLPQDDNNEDECTVSSLRQQKMKVKSIDIQRIVADLFLLAADTTSHTTQWVLLLLARHEEVONKI

#### Helix-K

#### SRS5

375 FHLKDLSDQEDILR-----LPLKGIITKESLRLYPTAPFTISRYLPEDSVIGNYFVFKGELLVLSLYSSGRDAANFPQPN  
 319 RENPD-----FVKHVEKETLRLYPVAPFLTRILPEDAILGGYGVPKGFTLVVMSIYTSGRDGRYFKNPG  
 368 AMERATNDSR-----LMHGLTIKESLRLYPVAPFTIGRYLFDQAQLGGHFEKDTMVLVLSLYTAGRDPSEHEPE  
 309 FYEIELVQSSKQRIGDEWQHPTIKGSVKEALRLYPVATFLTRIMQEOCTEGGYNIPEPDTLMLMSAYTSGRDERYEFWNAQ

#### "PERF"

#### Heme-binding

#### SRS6

449 BERPERWIRTQKGIYQGVVHPHASLPFALCARSCIGRKLAETQTSFALAEILKSEKTECINKNQVKLILHLISVFSQSITK  
 382 DEQPERWDRKDE--FYSEMKKASLPFANGLRACVGRKVAETQLQMTLLKIVNKEVEELGNQREVEIVLKMVAVPSEPLL  
 436 RVLPERWCIGET---EQVHKSHGSLPFALGQRSCIGRRVALKQLHSILGRCAAQFEMSCINEMFVDSVLRMTVPEDRTLRL  
 389 DEIPERWNRHGFSNGGMVMDPFASLPFCHGRRCIGRRLAESQMYITLLYKATPRETFQABN--HVKMIMRLIGTVDPQVQ

529 LKLMERN-  
 460 LKFRKL--  
 513 LALRERTE  
 467 LELRTES-

**Apis Shd-CYP314A1** 1 -----MLSSAWFEVITAAVLITILIF--VTSHPRAWWFWTATSHEASAFAEGKFKTISKVPGEFSLIFIGTRWII  
**Tribolium Shd-CYP314A1** 1 -----MFEKTFQSLDVTSLIIIAIFFL--FLEYRPPWMTIRNNDCKKG-----VKLIPGELALLEGLTWTII  
**Drosophila Shd-CYP314A1** 1 ---MAVILLALLALVILGCYCAIHRHKIADIYLRPLIKNTLLEDFYHAE LIQPEAKRRR-RGWDIIPGEKRIEFLGTQWII  
**Daphnia Shd-CYP314A1** 1 MGVLLKKLQRFILILVLTQVRVSKSYFLWSEKIFLPEADNKEFLNDGDVLPAPK-----FSQIPGELHVLVLFSGQWII

**SRS1**

68 HS-CIGYYKINKIHDAKYDINQRYGALCKEEALWNFMISVFSRQDIETITRRNSRYPLRPPQEVISHYRRTRDRYTNI  
 59 F--FFGGSFENRLHLYYENMYKRYGPMKEEYWCNIPVINLEEKRSIVKVLKAGGKYPLRPPVDAVAHYRSRPDRYASI  
 77 ELLFFRRYKTKLFEVYADLNQCYGDIVLEVMPNSNPITVHLNRRDLLEKVLKYPSPYPERPPTETITVMYRQSRPDYASV  
 74 YS-WIGPYFDKHLLANEDKYRKYGPVVKHF LWNFPITLHLMDKHDIESVLKYPSKYPTRGLEAQIYFRKSRPDYKSA

**Helix-C**

147 GLVNEQGQTMDHLRVALTSELTAASTVLGFFPALNIVADSFIELIRQR-VGYKVT-GFEELAYKMGLESTCTLLILGRHL  
 137 GLVNEQGEAWYDLRSTLTLPALTSPTKTIISFLEAQQIADDWCNLLKLSRDKNGRVS-NLNYIADRLGLELTCTALVLGRM  
 157 GLVNEQGPMMQRLRSSLTSTSTSPRVLQNFELPALNAVDDDEIELLHARRDPDTLVVPNFEELANLMGLEAVCTMLMLGRM  
 153 GMVNVQGFENQHLRSKLTQLASTALGDHTIAQLCIISDELIEKIQEER-VENIVD-GFEKVITYRCGLEVIFATILFGRRL

**SRS2/3**

225 GFLKPDY--SSELATRLAEAVRIHETASRDATYGLLELWKLPTCAIKQLIESEDALYNITSEITETITQEKRDDAKDES--  
 216 GELLPGA-ETGETEKLAEAVRCHETAGTRDTYEGEEFNKFLFPAYKTLIKSEASLYELALELINSANESTKEA-----  
 237 GFLAIDTKQPKISQLAAAVKCLFISQRDSYGLGLWKYFPTKTYRDFARAEDLTIDYVITSEITDHELELKKSAACEDDE  
 231 GALKNS-IPPIAEALMFATENLEFVSHETMYGLEWVKLFPTKSYKLAECEDTIYDVFTDLVNEALNDNENTETIQSF--

**SRS4 Helix-I**

302 ---VEAIFCSILRQKNLDIRDKKAAIVDFIAAGIHTLGNTLVFLFDLIGRNEAVQNKLYEETY-ALAPAGCDLTIDNLRK  
 289 -----VFQSVI-QAEIDIREKIAAIIIDFISAGIHTMKNSLLEFLLHLIGQDLQIQKKIIDS-----T  
 317 AAGLRSTFNLNILELKDLDIRDKKSAIIDFIAAGIETLANTLLEVLSSVTGEGAMERILSEFC-EYRDTN--ILQDALTN  
 308 -----VLNQLITABGVDIRDKVAILDLVAAGIETTGNAITLLELHNIVSNEEVKARVYEELDRVLYSSHVTITPQILLE

**Helix-K SRS5 "PERF"**

378 AKYLRACTITESRLRIPTTTCTARILDEPIELSGYRLTAGTVLLHTWIAGLNEENKDAKKYLPERWT-----TPTTPH  
 345 KSYKACVTEITFRLLPTANALGRILEEEMELGGYRLSAGTVVVCHFGIACRDERNEPDASKFKEPERWLD--DDKVQATN  
 394 ATYTKACIQESYRLRPTAFCLARILEEDMELSGYSLNAGTVVLCQNMIACHKDSNFGQAKQFTPERWIDPATENFTVNVD  
 382 LKYLKACVTESLRITETVAPNVARILEKSFTFQSYNPVGAIVICETWVSSLDENNPDAKRFITPERWLD----ADKVNH

**Heme-binding SRS6**

452 SPILLVAPFGACRRICPGKRFVDLALQLILAKITREFETIVEEELDQFEFELAPKGPVSIIGFRDRS-  
 423 SLFLITPFGACRRICPGKRIEHLPLLLESTWNSFETIQAEEELELQFEFLVTPKGMVMPVFKDRV-  
 474 NASIVVFFGVGRRCSPGKRFVEMEVVLLAKMVLAFDVSFVKFLETEFEFELAPKTPLSIRLSDRV  
 457 HFLVAVFGVGRRCSPGKRIAEHBMILITAKILLQTFDMSTQKHELVYKFLISPKGPIRATLQDRH-
