# Supplementary material for: Daphnia Halloween genes that encode cytochrome P450s mediating the synthesis of the arthropod molting hormone: Evolutionary implications
Source: BMC Evol Biol. 2008 Feb 25;8:60. doi: 10.1186/1471-2148-8-60 (PMC2276477; doi:10.1186/1471-2148-8-60)
Supplement: Additional File 2 — Deduced protein sequences of Daphnia pulex Spo-CYP307A1, Phm-CYP306A1, Dib-CYP302A1, Sad-CYP315A1 and Shd-CYP314A1. [file 1471-2148-8-60-S2.pdf]

## Additional file 2

**Deduced protein sequences of *Daphnia pulex* Spo-CYP307A1, Phm-CYP306A1, Dib-CYP302A1, Sad-CYP315A1 and Shd-CYP314A1.** Information about the genomic sequences and protein ID obtained at The DOE Joint Genome Institute [<http://www.jgi.doe.gov/>]. Introns are indicated by (0), phase 0 intron; (1), phase 1 intron; (2), phase 2 intron.

### ***Daphnia* Spook (Spo: CYP307A1):**

(Dappul/scaffold\_4:1888919-1892238; Protein ID 41863)

MADSLFFRIKSKAQRLVRSHLAKSSAAKASAAAATAVPVVTAAATSAGTSAGVVAKPWSPPPGVGPVIGSLHLLGQY  
EVPFEAFSELSKIYGDIFISITLGSTPCVVVNSFKLIKEVLITKGPFGGRPNFIRYDILFGGDRDN (1) SLALCDWSYLQ  
RDRRSIARHWCPRVDMSQFDTLSRVLTSESDLMVNELSLMTAAAAAGKGIDLKTMTMTMCANVFTHYMCSTRFDYNNKE  
FGKVVRFLFDQIFWDINQGYAVDFLPWLMFPVYRRHMQQKLSWGTDIRQFIVKTIIDEHRSTMDVNNPRDFTDVLSSQLGNE  
KNNGENVQAADHNDNEKQLDWNHVLVELEDFLGGHSAIGNLLMRAVGELCSSPHVMANIQEEIRKVTCDNSRPVVLEDRP  
SMPYTEATILETLRLSSSPIVPHVAMQNTSVA (1) GYDVQEGTMVFLNNYELNISPDYWGDDQALTFDPAKFIIQGIKIVKP  
EYFIFPSTGKRACMGYRLVQHVSFVTLATLLQNFDVSASEDVIHLPKACVAVPPDAFRVVLTPRPSAPASY

### ***Daphnia* Phantom (Phm: CYP306A1):**

(Dappul/scaffold\_10:1477916-1482392; Protein ID 46010)

MEEGVLEEEEARSVGVWAWLSLSSLLGLLALLWLRFSQQQRNRQLLLLLPPGPSGLPWLGYPWIDSRAPYETFAELSR  
RYGRIYSLKLGDM LAVFISDPQLVRQAFSRPVFSGRAPLYLTHGIMKGH (1) GLICAEGESWREHRRFVMNVMKQLGMAG  
RRGASVMESRVMAGVLEFVH (0) CQVTDGGVGGGVLDLPGLRHICIGNIINGVVFGRTYAADDPTWIWLQHLDDQGVKQVA  
VAGPINFLPVLR (2) FLPSYRKIMSFILDGQAETHRHYQEIIDQRQLNLSANQG (1) PDYTSVVEAYLLEMQRQSAGIP  
PETFTTVQLHHVLADMFGAGTDTALTTIKWIVLYLILYPDVQ (0) ERIHEEIERVVGQLDQGRIPCYATDARRMPWTEAT  
ICEVQRLKTIILPLGVPHGTQLQ (0) DCELAGYRIPKGAMVVPVWAMNLDPTLWPEPLQFRPERFL (0) EEEEEKWRVEKP  
EHFLPFQCGRMCIGDDLGRITLIFLFTVTLLQHFRLSFPPQFTDYSATNFPQPDYGTFLVPHYPVALHPR

### ***Daphnia* Disembodied (Dib: CYP302A1):**

(Dappul/scaffold\_811:2049-4377; Protein ID 204789)

MFSKQIPWTLCLPSRLCGGQKCVDKQVYFYFNQTTCTIHNCPHQFPTSESTKEMKPFSGSIPGPKPLPVVGNIWRYAI (1) GQ  
YSFDQLHVTGLKKYLQFGPIVREEILPGVNNLLLYRPEDIERYMYQVEGRYPSRRSHTALEFYRLQRPHIYNSGGLLPT (2  
) NGPEWFRRLRQALQRPINMMENIRQYIPGIDNISSEFAEQIAISIKKNKTSPDFLEDLSKVFL (1) FIGLVTFTDTRLGS  
LRTDLPDGDSCPNKLIQAASDTNSEILRTDNLQFWRKWNTPAYKRITRSQEYFER (2) VASEFVNAKNAELRSRNGQDQS  
QKTLEEVYLTSKDLDDVKDVMTMVSMDMLLAGIDT (0) SSYTMSEFILIHLARNPLKQEKVYQEVNRFVNPSTSPVTQGILAE  
LKYLKAAVKESFRNLPISIGVGRILPEDSSFSGYHCPKN (0) TILVSQNQVSCKLDYFKNPLLFVPERWMKGDAAYEKT  
HPYLVLFPFGHGPRACIARRLAEQNLYILLSR (0) LVKRFSIEWNGAELDVRSQLINRPDAPLKFNFVERRNC

### ***Daphnia* Shadow (Sad: CYP315A1):**

(Dappul/scaffold\_93:309807-311873; Protein ID 60760)

MASYLRHPIRRISLLERRCYTAKSQPFDSIPAPKGLPL (0) VGTLWDVIRAGGVSQIHRYIDDRHRQLGPFIKREKLGHVE  
AVWLADPALYEQVFQKEGTCPRMLPEPWLIILNKKHAYKRGLFFM (2) QGEWLRYRKILSPLLLKTATLHRHIESFYDV  
ADRLLDKWEHTENGLITHLEGDLYCYFVQ (0) VHILVLVNWLNQEFYMNRFRIIKTKITCWAISIGSARLTLLPPALAAK  
LNLDAWRCFEQSALSALQLANQLTQTCLLEKLPQDDNEDDCIVSSLRQQKMKVSDIQRIVADLFLAAADT (0) TSHTTQ  
WVLYLLARHPEVQNKIFYEIELVQSSKQRIQDEWQHIPTIKGSVKEALRLYPVATFLTRIMQEQCTIGGYNIPPD (0) TL  
MLMSAYTSGRDERYFWNAQDFIPERWNRHGSPNGGMVMDPFASLPFGHGRRGCIGRRLAESQMYILLYK (0) AIPRFTFQ  
AENHVKMIMRLLGTVDQPVLRLRTRS

### ***Daphnia* Shade (Shd: CYP314A1):**

(Dappul/scaffold\_43:996318-999232; Protein ID 198743)

MGVLKKLQRFIILIVLHTQRVVSKYFILWSFKIFLPEAEDNKFFLND (1) GDVLPAPKPFSSQIPGPHVPLFGSQWLYSWI  
GPYFLDKLHLANE (1) DKYRKYGPVVEHFLWNFPPIIHLYDKHDIESVLKYPSKYPIRPGLEAQIFYRKS RPDYK (1) S  
AGMVNV (2) QGFQWHLRSKLTQTALSTALGDHTIAQLCIISDELIEKIQEERVENIVDGFQKVIYRCGL (1) VIFAIL  
FGRRLGALNKNSIPPIAERLMFATENLFVSHETMYGLPWKLFPTKSYKKLAECEDTIYD (2) VFTDLVNEALSNDENT  
EIQSPVLNQLTAEGVDIRDKIVALIDLVAAGIET (0) TGNATFLLLHNIVSNPEVKARVYEELDRVLYSSHVTITPQLL  
LELKYLKACVTESLR (2) LTPVAPNVARILEKSFTFQGYNVPVG (0) AMVICETWVSSLQDENYPDAKRFI PERWLDADK  
VNHHFPFLAVPFGVGRMCPGKRIAEHEMLIITAK (0) LLQTFDMSFQKPLEQVYKFLISPKGPIRATLQDRH
